# Supplementary material
Source: PubMed Central journal article supplement (PMC7423760)
Supplement: NIHMS1602628-supplement-1.pdf [file NIHMS1602628-supplement-1.pdf]

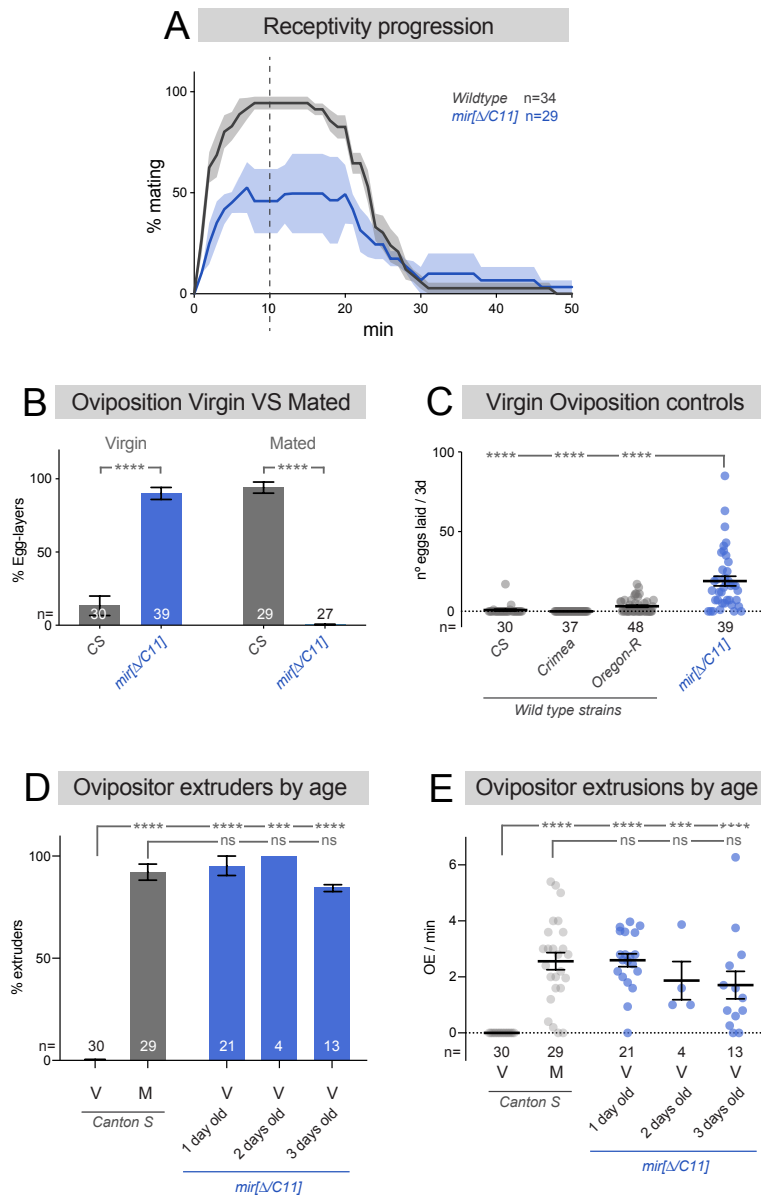

**Supplementary Figure 1 (related to Figure 1). Extended behavioral analysis of *mir-iab-4/8* mutants.**

(A) Temporal analysis of sexual receptivity, assessed by the fraction of individual females that are copulating at a given timepoint. The 10 minute timepoint (dotted line) was used subsequently to summarize and compare multiple genotypes or manipulations, shown in Figure 1C. (B) Qualitative oviposition in wildtype and *mir[ΔC11]* flies. Egg-laying is uncoupled from internal state. (C) Quantitative egg-laying counts across several wild type strains. Qualitative (D) and quantitative (E) representation of ovipositor extrusions. Overall levels of male rejection by extruding the ovipositor is maximal in young virgins (1 day old). Fisher's exact test for qualitative analysis (B, D), and Mann-Whitney non parametric test for quantitative analysis (C, E). ns=not significant, \* p<0.05, \*\* p<0.01, \*\*\* p<0.001, \*\*\*\* p<0.0001. Error bars and shaded area = SEM.

A

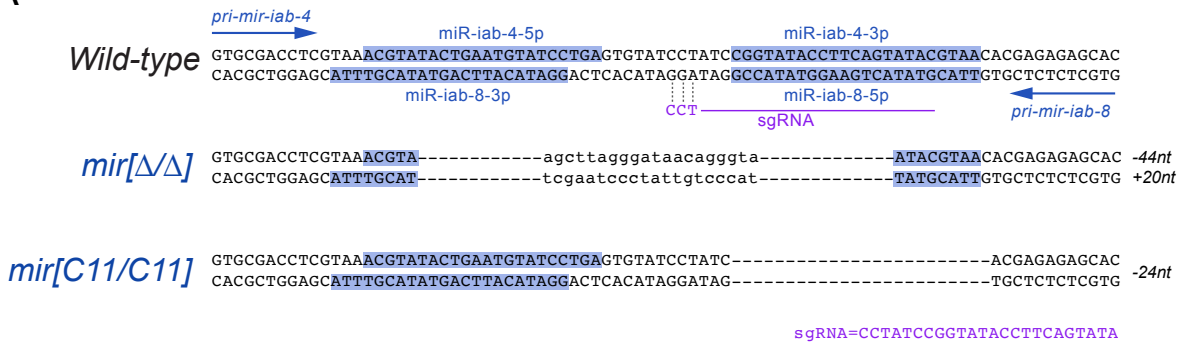

B

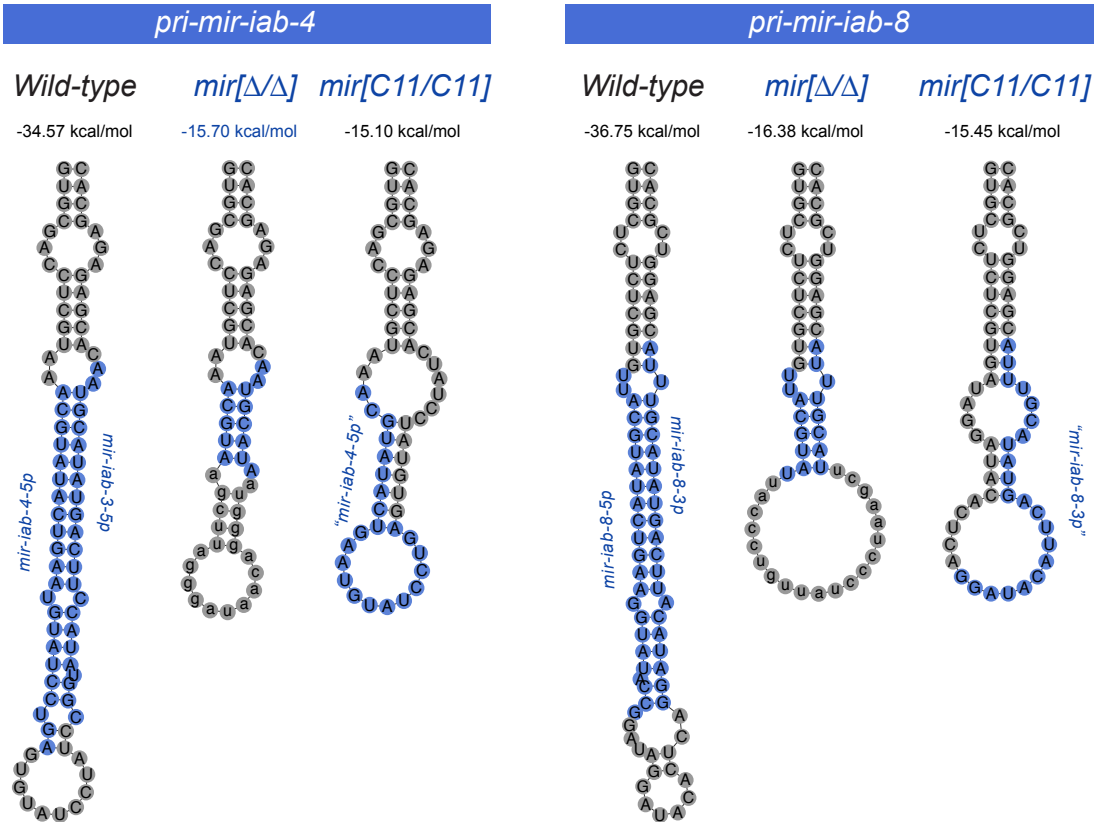

**Supplementary Figure 2 (related to Figure 1). *mir-iab-4/8* mutant alleles.** (A) Wildtype, *mir[Δ/Δ]* and *mir[C11/C11]* sequence. (B) RNAfold predictions of each allele. The newly made *mir[C11]* allele deletes miR-iab-8-5p (miR-iab-4-3p) and does not adopt a pre-miRNA-like hairpin structure. Blue=*mir-iab-4/8* species in each allele. Magenta= sgRNA used to mutagenize *mir-iab-4/8* locus. Low-case letters: inserted nucleotides. nt=nucleotides.

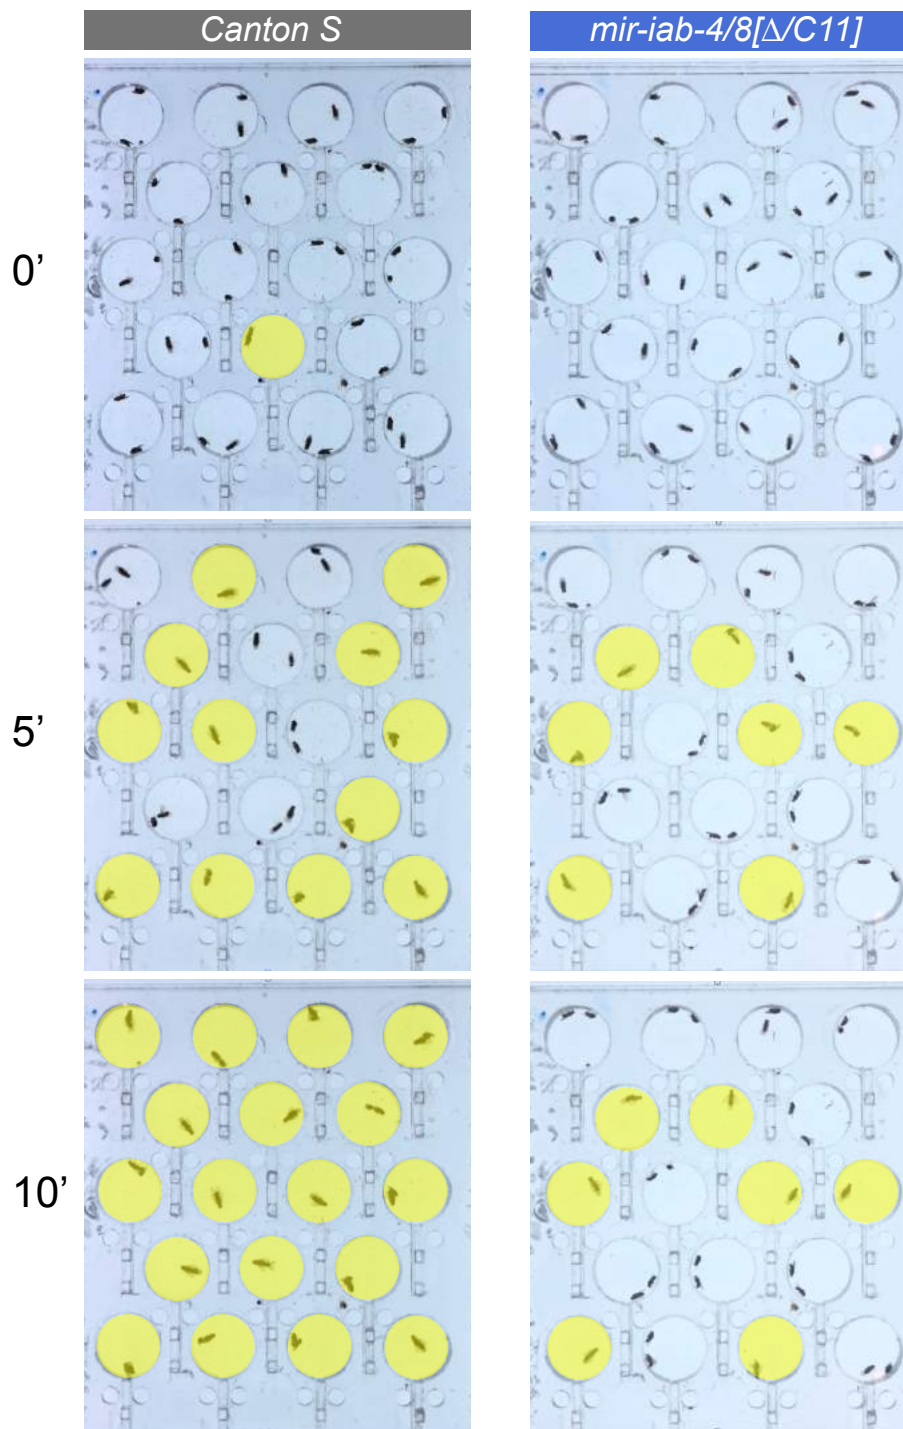

**Supplementary Figure 3 (related to Figure 1). Receptivity dynamics in *mir-iab-4/8* mutants.** Time lapse shots from movies of 18 *wildtype* (*Canton-S*) and 18 *mir*[ $\Delta$ /*C11*] female flies. In all cases males are *Canton-S*. Mating couples are marked in yellow. Compared to control, the copulation success of *mir*[ $\Delta$ /*C11*] mutants is markedly reduced.

larval VNC

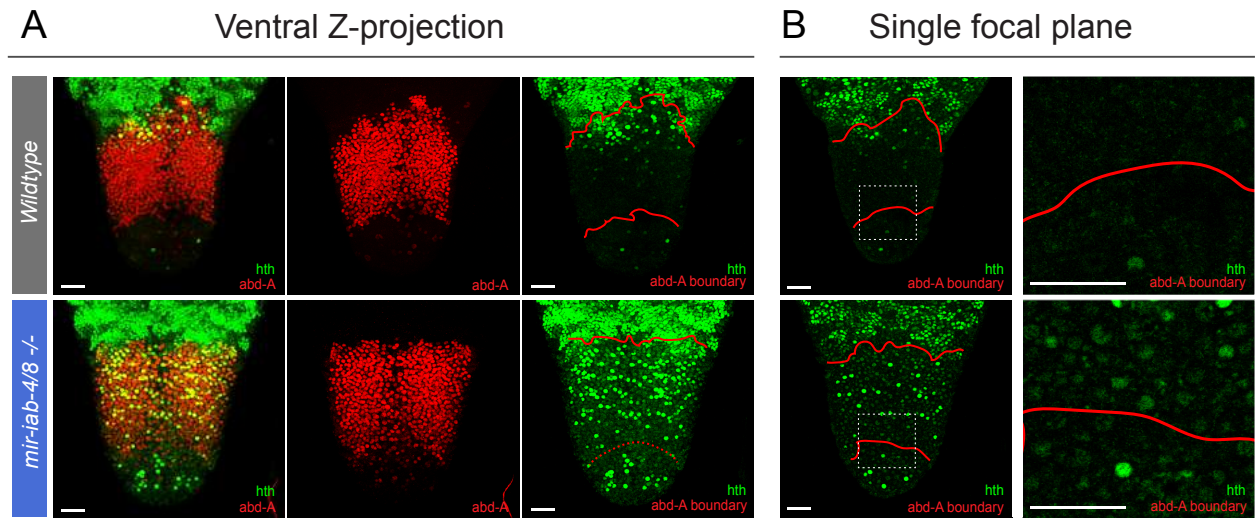

adult VNC

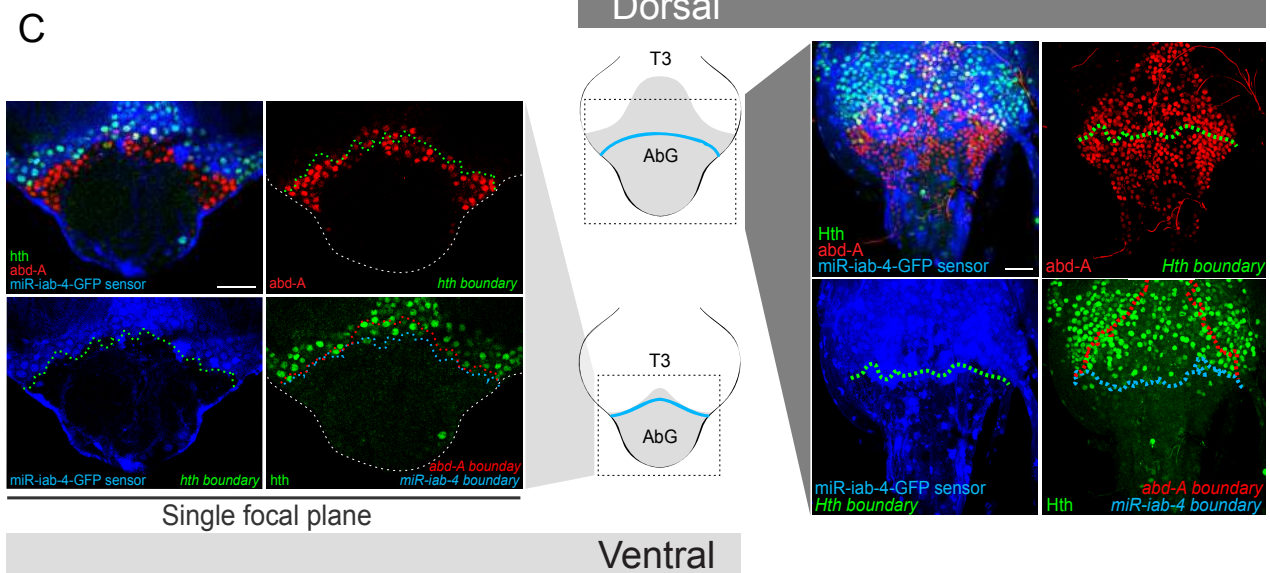

**Supplementary Figure 4 (related to Figure 4). Extended characterization of Hth expression: I.** (A, B) Hth immunostaining (green) in larval VNCs. (A) Hth is derepressed in abdominal segments (Abd-A, red) of *mir[ΔVC11]* female larvae (Z-projections). (B) Mild levels of Hth accumulation are detected in nearly all cells of mutant VNCs. Along the dorsoventral axis, Hth is mutually exclusive with miR-iab-4 and miR-iab-8 (inferred from activity *tub-GFP-sensors*), but not with Abd-A (C). Scalebar= 25µm.



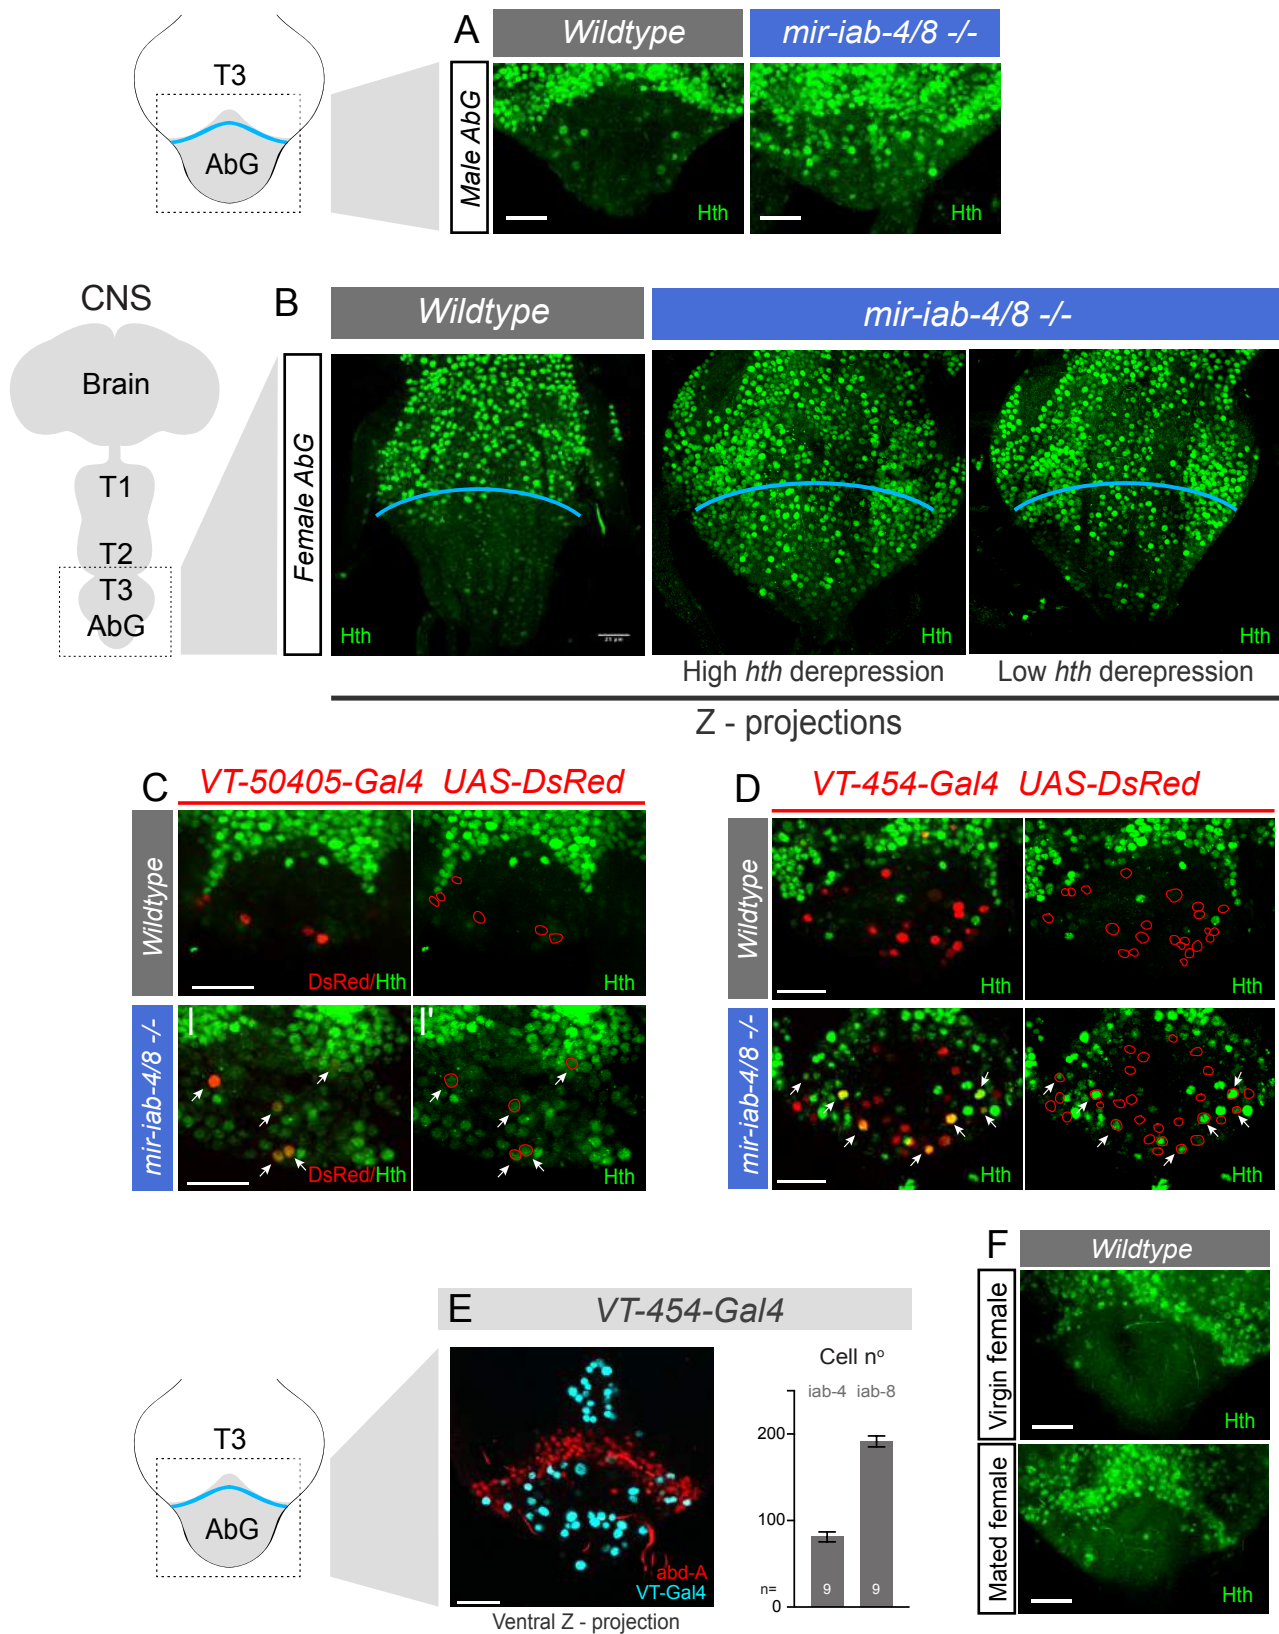

**Supplementary Figure 5 (related to Figure 4). Extended characterization of Hth expression: II.** (A) Hth expression in AbG of wildtype and *mir-iab-4/8* mutant males is similar to their female counterparts. (B) Hth accumulation in wildtype and two *mir-iab-4/8* mutant female VNCs, illustrating variability of derepression in *mir-iab-4/8* nulls. (C,D) Hth expression relative to VT-switch neuron populations. Only showing the AbG boxed in A. Some *VT-454* labeled neurons show especially high accumulation of Hth protein (arrows). (E) Z-projection of *454-Gal4* VT-switch neurons (cyan) co-stained with Abd-A (red). Number of VT-switch+ cells per VNC domain (*iab-4* vs. *iab-8*). (F) Copulation does not affect Hth expression levels in the female AbG. Scalebar= 25µm. Bars in E correspond to SEM.

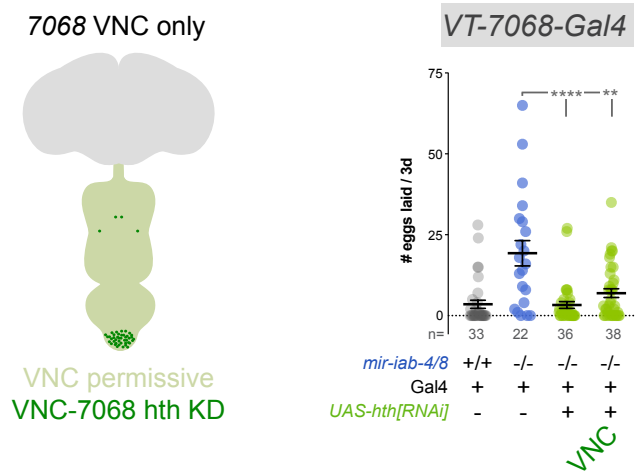

**Supplementary Figure 6 (related to Figure 5). VNC specific *hth[RNAi]* rescues.** Restriction of *hth* knockdown to the VT-7068 neurons in VNC in *OTD-flp, tub>stop>Gal80/UAS-hth-[RNAi]; 7068-Gal4, mir-C11/ $\Delta$ mir* flies, is sufficient to revert significantly the elevated egg-laying observed in *mir-iab-4/8* mutants. Mann-Whitney non parametric test, \*\*  $p < 0.01$ , \*\*\*\*  $p < 0.0001$ . Error bars= SEM. Wildtype flies are *Canton-S* strain, *mir-iab-4/8* -/- mutants=*mir[ $\Delta$ C11]* transheterozygotes.

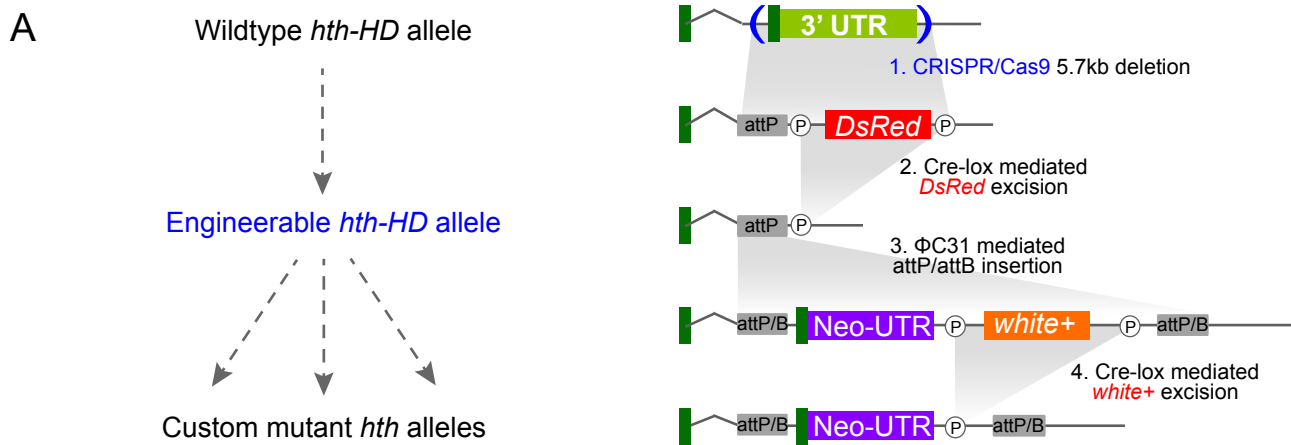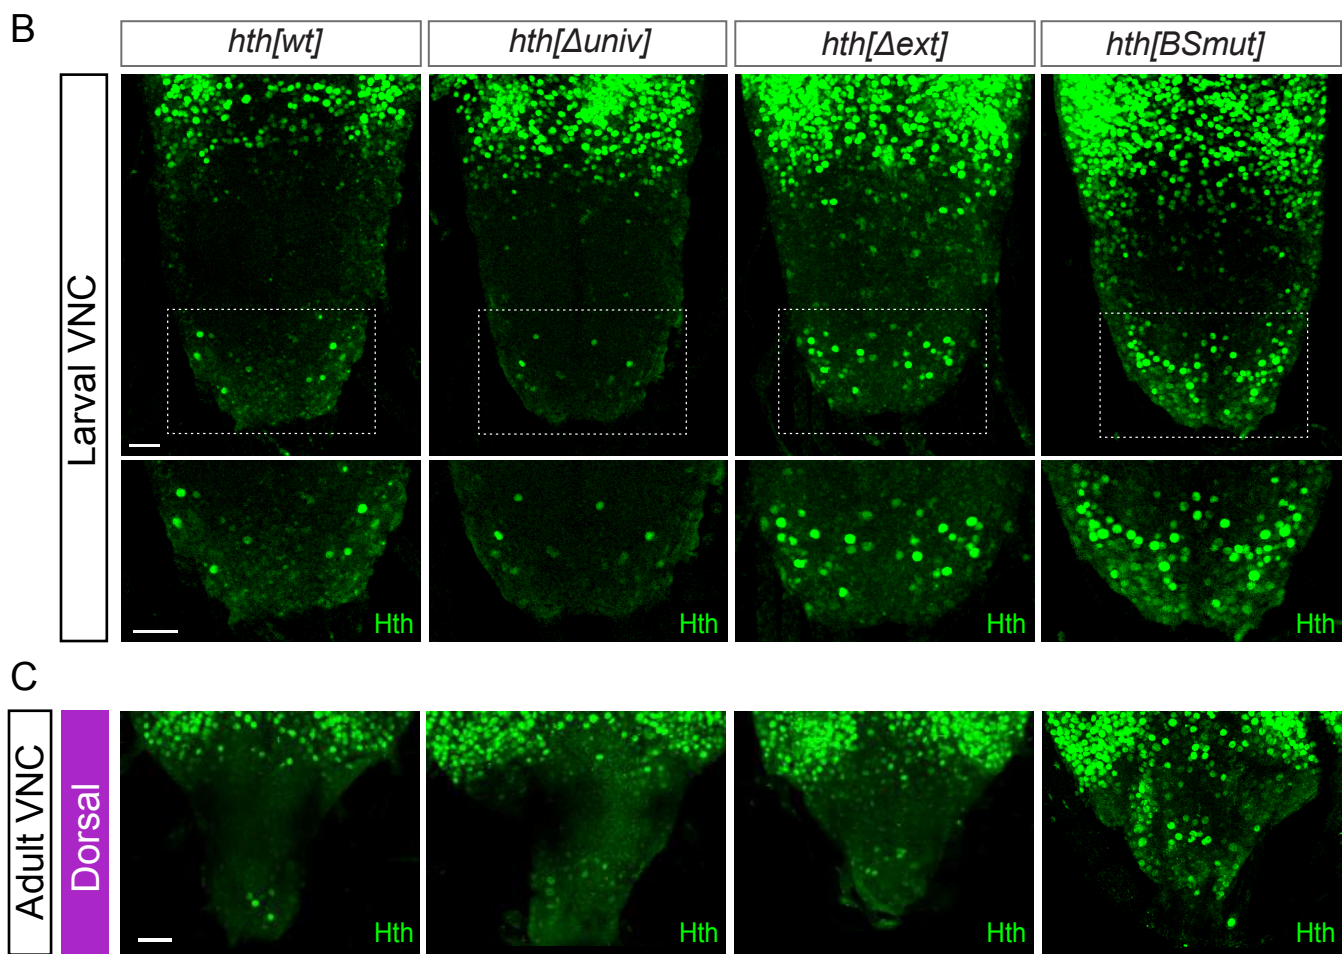

**Supplementary Figure 7 (related to Figure 6). Hth engineering pipeline and patterning in *hth*-HD 3'UTR alleles.** (A) CRISPR/ $\Phi$ C31 approach to generate the 3'UTR engineering platform in *hth*-HD isoform. Hth pattern in the entire abdominal region of larval VNCs (B) and the dorsal region of adult AbG of *hth*-HD 3'UTR alleles. Scale bar= 50 $\mu$ m.-

**Supplementary Table 1 (related to Figure 6).** sgRNA guides and primers used for CRISPR-Cas9 engineered alleles:

| <b>sgRNA sequences for <i>hth</i>-HD deletion</b>                            | <b>Coordinates</b>     |
|------------------------------------------------------------------------------|------------------------|
| Intron break:                                                                |                        |
| GAGGCCGTGTCAAAGCTTGC-GGG                                                     | chr3R: 6337918-6337932 |
| GTGACTGTCACTCGGCCCGC-CGG                                                     | chr3R: 6337877-6337891 |
| TTAAAGCAGAAAGCCGCCGG-CGG                                                     | chr3R: 6337869-6337883 |
| GCAGTTGCCCGTTGATCCGC-AGG                                                     | chr3R: 6337807-6337821 |
| GCTTGCGGGTAACATCGTCT-TGG                                                     | chr3R: 6337904-6337926 |
| Downstream break:                                                            |                        |
| CGAGCTGGTGGCTCTCCCGC-TGG                                                     | chr3R: 6332418-6332432 |
| AAAGTAATTACAGCCGCCGA-CGG                                                     | chr3R: 6332151-6332165 |
| TGCCTATAATTAGTGGGCAG-TGG                                                     | chr3R: 6332216-6332230 |
|                                                                              |                        |
| <b>Primers used to clone homology arms in pHD-attP-DsRed:</b>                | <b>Coordinates</b>     |
| "Intronic" Homology Arm (Left):                                              |                        |
| Fwd; AATATCGCATCGCCCC                                                        | chr3R: 6338982-6339004 |
| Rev; AGCTTTGACACGGCCTC                                                       | chr3R: 6337921-6337940 |
| "Downstream" Homology Arm (Right):                                           |                        |
| Fwd; GCGGCTGTAATTACTTTTACG                                                   | chr3R: 6332139-6332159 |
| Rev; AATAAATGGCTTGACAAACGC                                                   | chr3R: 6330834-6330854 |
|                                                                              |                        |
| <b>Primers used to verify <i>hth</i>-HD[<math>\Delta</math>attP] allele:</b> |                        |
| <b>Sequence</b>                                                              | <b>Coordinates</b>     |
| Fwd; AACACTGCGTAGAAAGGTCC                                                    | chr3R: 6339186-6339205 |
| Rev; AGTGCATTAATGAGCCTCGG                                                    | chr3R: 6330700-6330719 |
|                                                                              |                        |
| <b>Primers used to clone <i>hth</i>-HD 3'UTR alleles:</b>                    |                        |
| <b>Sequence</b>                                                              | <b>Coordinates</b>     |
| Intronic/exonic region for pRIV-w-CR/DS generation                           |                        |
| Fwd; TGCGGGTAACATCGTCTTGG                                                    | chr3R: 6337904-6337923 |
| Rev; TTACAAGTGCTGGCCGTAGT                                                    | chr3R: 6337099-6337118 |
| Intergenic region pRIV-w-CR/DS generation                                    |                        |
| Fwd; CGTGAAAGTCTTTTGAATTGTC                                                  | chr3R: 6333257-6333279 |
| Rev; CGACGGACAATGCGGGG                                                       | chr3R: 6332160-6332179 |
| wt-3'UTR (for <i>hth</i> [wt] allele)                                        |                        |
| Fwd; TCCTCGTAATCCGGCCC                                                       | chr3R: 6337079-6337098 |
| Rev; ATTGGTTTTCATAATCTTTTATTTTCAT                                            | chr3R: 6333280-6333306 |
| univ-3'UTR (for <i>hth</i> [ $\Delta$ ext] allele)                           |                        |
| Fwd; TCCTCGTAATCCGGCCC                                                       | chr3R: 6335562-6337098 |
| Fwd; TCCTCGTAATCCGGCCC                                                       | chr3R: 6337079-6337098 |

|                                                                                            |                        |
|--------------------------------------------------------------------------------------------|------------------------|
| Rev; TTATTTTTTCAAATATTTTCTCATATATGC                                                        | chr3R: 6335560-6335589 |
| ext-3'UTR (for <i>hth</i> [ $\Delta$ <i>univ</i> ] allele)                                 | chr3R: 6333280-6335561 |
| Fwd; AATCTTTCTTAGTGTTTTTATTTCAAT                                                           | chr3R: 6335535-6335561 |
| Rev; ATTGGTTTTCATAATCTTTTATTTTCAT                                                          | chr3R: 6333280-6333306 |
| <b>Design of miR-iab-4 and miR-iab-8 mutant binding sites for <i>hth</i>[<i>BSmut</i>]</b> |                        |
| Wildtype sequence                                                                          | Mutant sequence        |
| miR-iab-4-5p                                                                               |                        |
| GTATACG                                                                                    | GAAAACG                |
| miR-iab-4-3p                                                                               |                        |
| GTATACC                                                                                    | GTAAGCC                |
| miR-iab-8-5p                                                                               |                        |
| ATACGTA                                                                                    | AAACGTG                |
| miR-iab-8-3p                                                                               |                        |
| ATGTATC                                                                                    | AAGTAAC                |



**Supplementary Table 2 (related to Figure 6).** Oligonucleotide sequences used to generate Northern probes.

| <b>Probe</b>                | <b>Forward primer (5'-3')</b> | <b>Reverse Primer (5'-3')</b> |
|-----------------------------|-------------------------------|-------------------------------|
| hth_universal_1<br>(exon)   | CGCTGGTAGTACTCCCGGTCCACTGT    | CCGGAGGGACCTGGATGCGGTGTATA    |
| hth_universal_2<br>(3' UTR) | TCCAGGTCCCTCCGGATATG          | TGCTTTTGTTATTTACGTTTAGGGT     |
| hth_short_1                 | CGAAATGCCAATCGAGCGAA          | CTTGGAAGCTCGTTTGTCGC          |
| hth_short_2                 | GCACATGGTCCTATATTGGCG         | TCTGCGTTCGGATTTGGATT          |
